# Supplementary material
Source: publisher figshare collection journal article supplement (https://acs.figshare.com/ndownloader/files/14469869)
Supplement: Supplementary file 1 [file 14469869]

# **Magnetic field regulating the graphite anode for excellent lithium-ion batteries performance**

Li Zhang <sup>a, b\*</sup>, Mingyang Zeng <sup>a, b</sup>, Dandan Wu <sup>a, b</sup>, Xingbin Yan <sup>b, c, d \*</sup>

<sup>a</sup> Department of Physics, School of Science, Lanzhou University of Technology, 287  
Langongping Avenue, Lanzhou, Gansu, 730050, P. R. China.

<sup>b</sup> Laboratory of Clean Energy Chemistry and Materials, State Key Laboratory of Solid  
Lubrication, Lanzhou Institute of Chemical Physics, Chinese Academy of Sciences, 18  
Tianshui Avenue, Lanzhou, Gansu, 730000, P. R. China.

<sup>c</sup> Center of Materials Science and Optoelectronics Engineering, University of Chinese  
Academy of Sciences, 19 Yuquan Avenue, Beijing, 100080, P. R. China.

<sup>d</sup> Dalian National Laboratory for Clean Energy, Dalian Institute of Chemical Physics,  
Chinese Academy of Sciences, 457 Zhongshan Avenue, Dalian, Liaoning, 116000, P.  
R. China.

\* Corresponding Authors.

E-mail: [zhangli@lut.cn](mailto:zhangli@lut.cn) (L. zhang) and [xbyan@licp.cas.cn](mailto:xbyan@licp.cas.cn) (X. B. Yan).

Total Number of Pages: 17

Total Number of Figures: 17

Total Number of Tables: 2

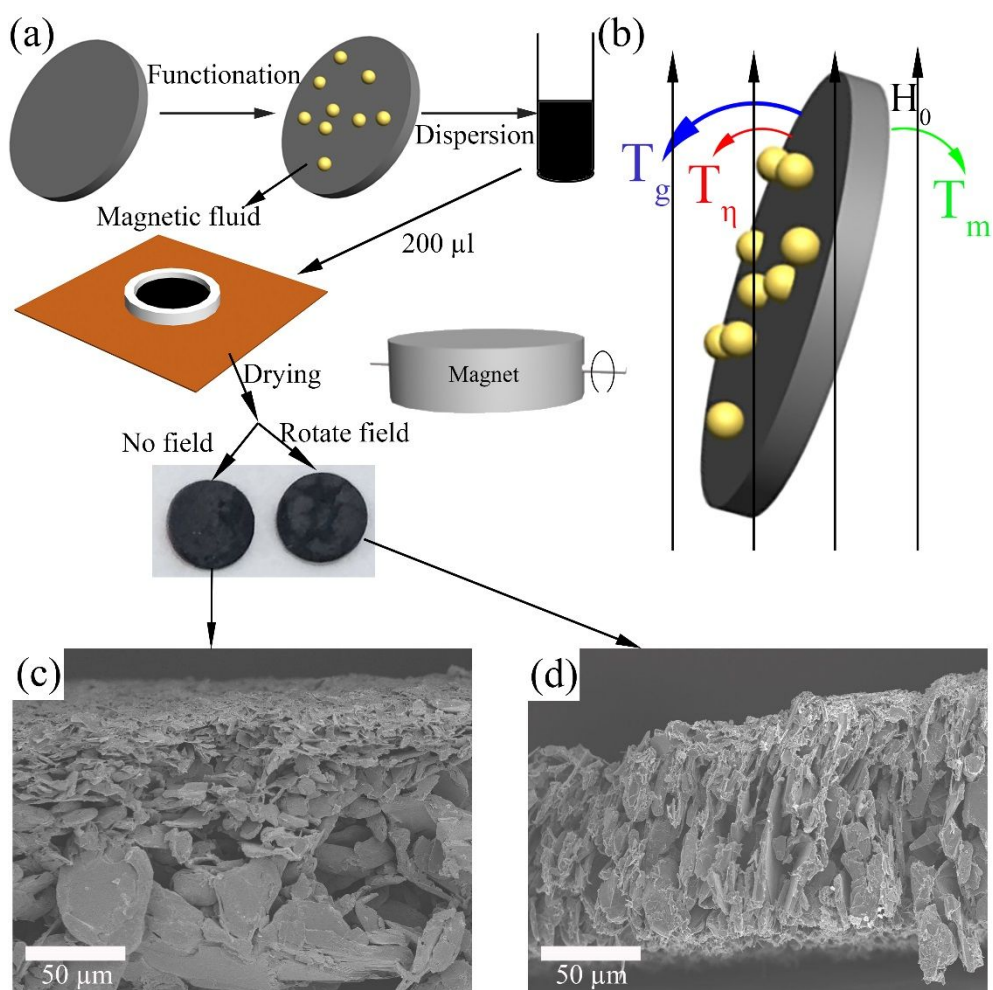

Figure S1. (a) Detailed process for preparing graphite negative electrode. (b) Schematic of graphite flakes in the process of alignment with an out-of-plane magnetic field  $H_0$ .  $\text{Fe}_3\text{O}_4$  nanoparticles adsorbed on the flakes surface is expressed by yellow balls. (c) and (d) Cross-sectional SEM images of the reference electrode and aligned electrodes, respectively.

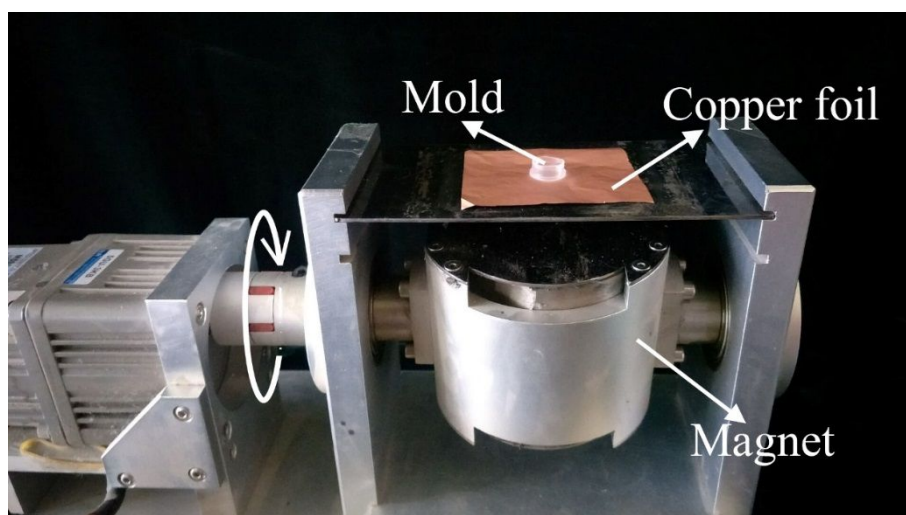

Figure S2. The equipment used for casting the graphite electrode following magnetic alignment flakes.

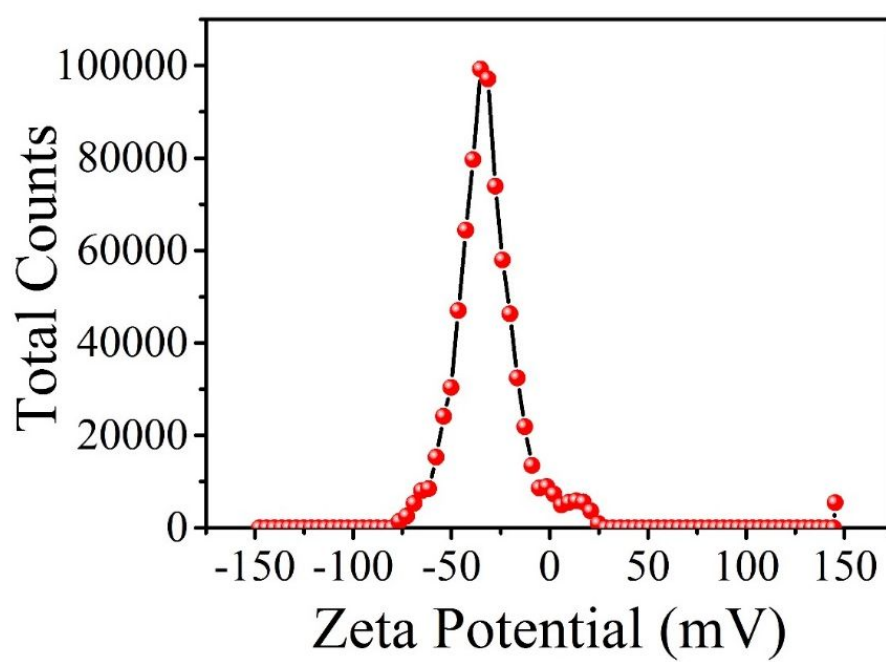

Figure S3. Zeta potential of the graphite flakes in water at pH=7.

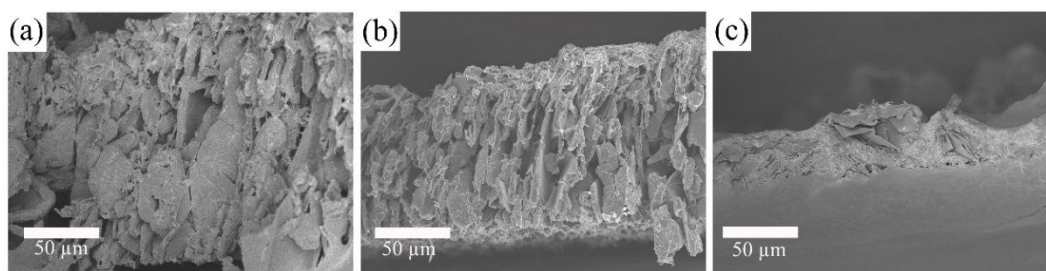

Figure S4. (a)-(c) Cross-sectional SEM images of the graphite electrodes obtained at the suspension concentrations of  $0.1 \text{ g ml}^{-1}$ ,  $0.05 \text{ g ml}^{-1}$  and  $0.025 \text{ g ml}^{-1}$ , respectively.

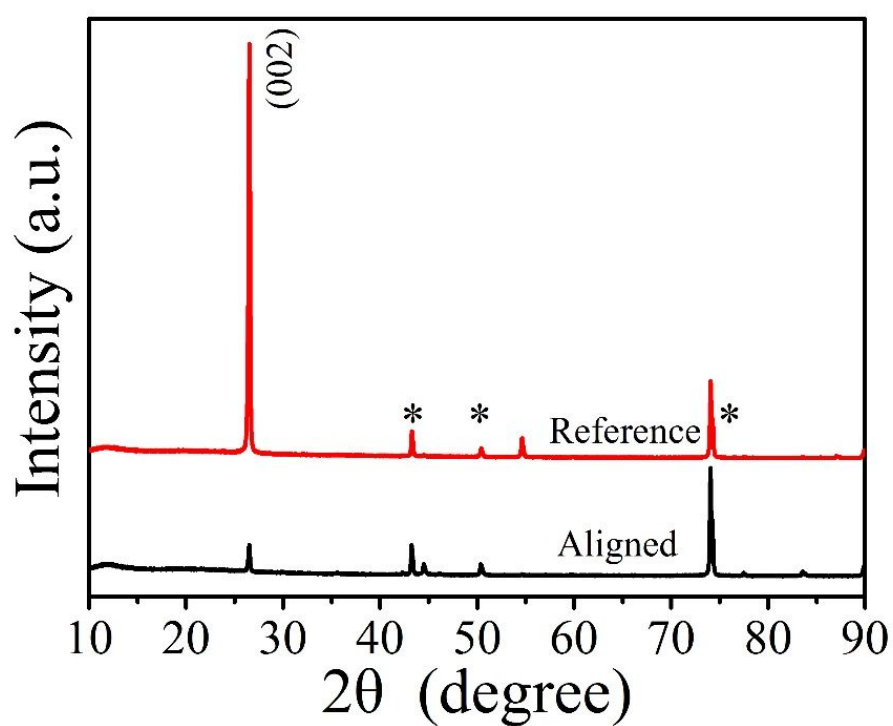

Figure S5. XRD images of aligned graphite electrode and reference electrode.

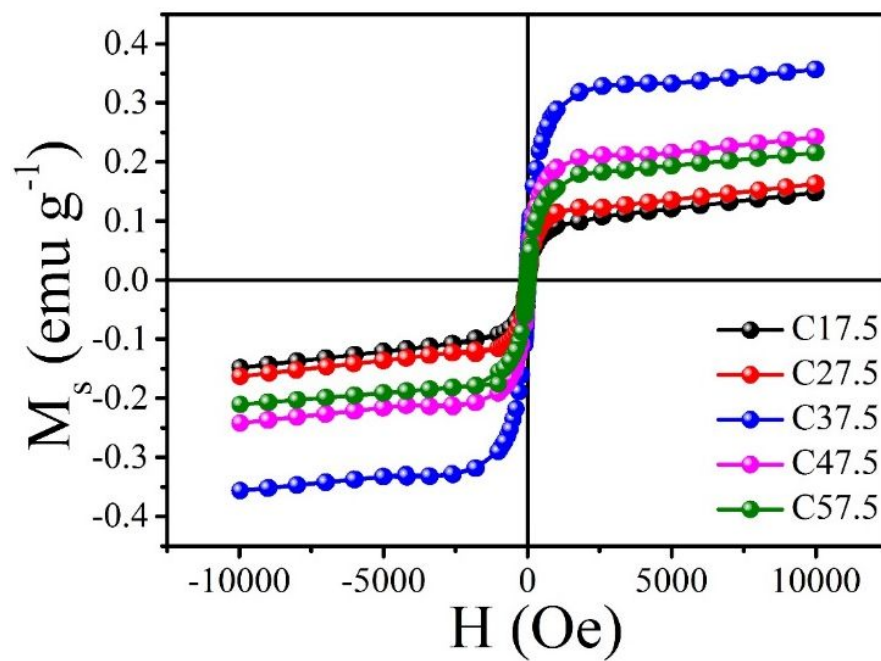

Figure S6. Magnetic hysteresis loops of functional graphite which prepared at different concentration of ferrofluid.

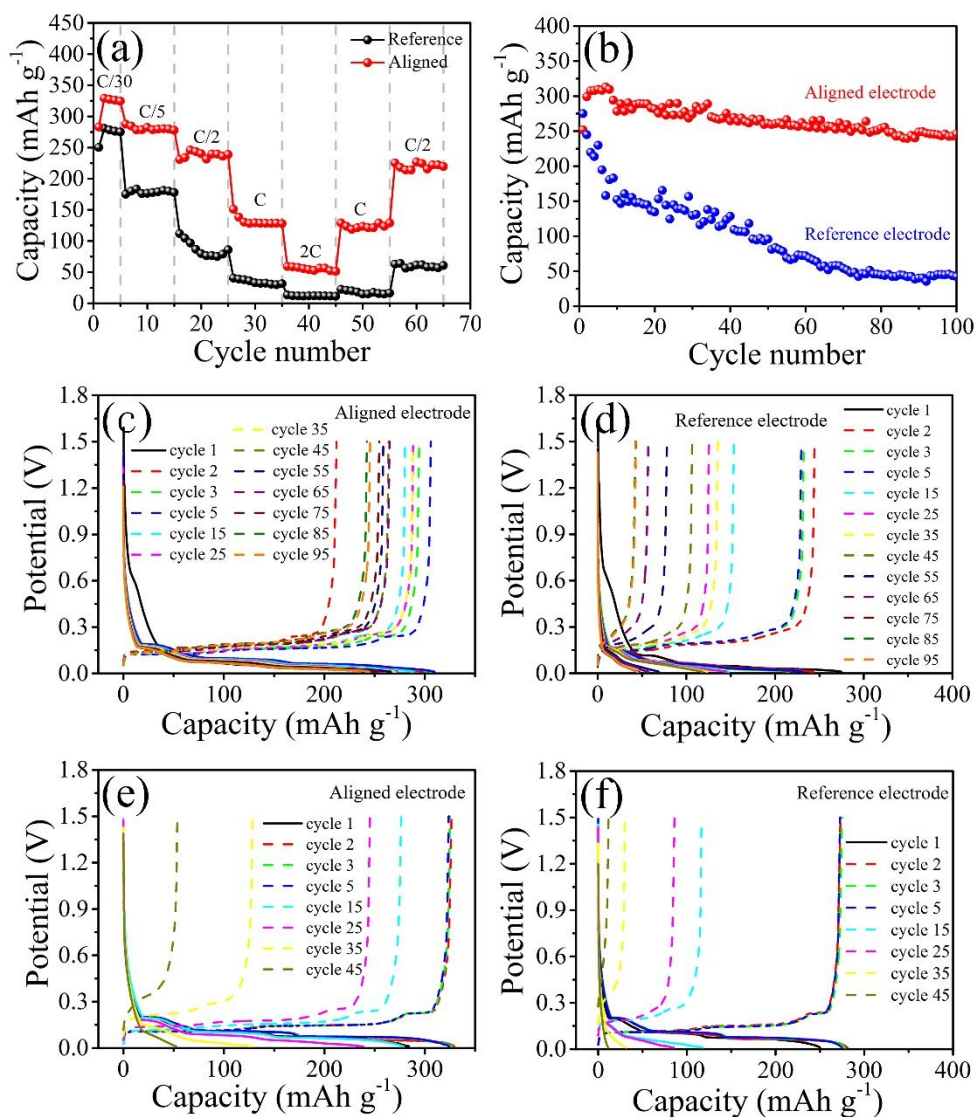

Figure S7. (a) Rate capabilities and (b) Evolution of the specific charge at rate of C/30 for aligned and reference electrodes, respectively. Galvanostatic charge-discharge profiles of (c) aligned and (d) reference electrodes at a low current rate of C/30 between 0 and 1.5 V versus Li<sup>+</sup>/Li. Galvanostatic charge-discharge profiles of (e) aligned and (f) reference electrodes corresponding to first five cycles at rate of C/30, 15<sup>th</sup> cycle at the rate of C/10, 25<sup>th</sup> cycle at the rate of C/2, 35<sup>th</sup> cycle at the rate of C and 45<sup>th</sup> cycle at the rate of 2C, respectively.



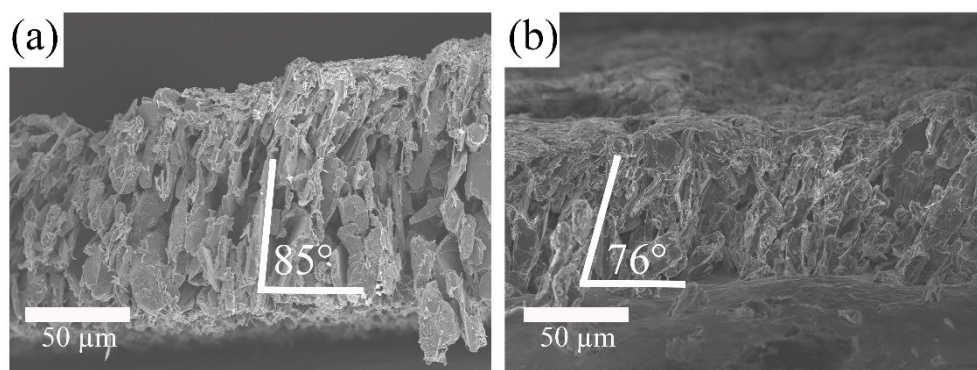

Figure S8. Cross-sectional SEM images of aligned electrode (c) before and (d) after cycling at rate of 1C.

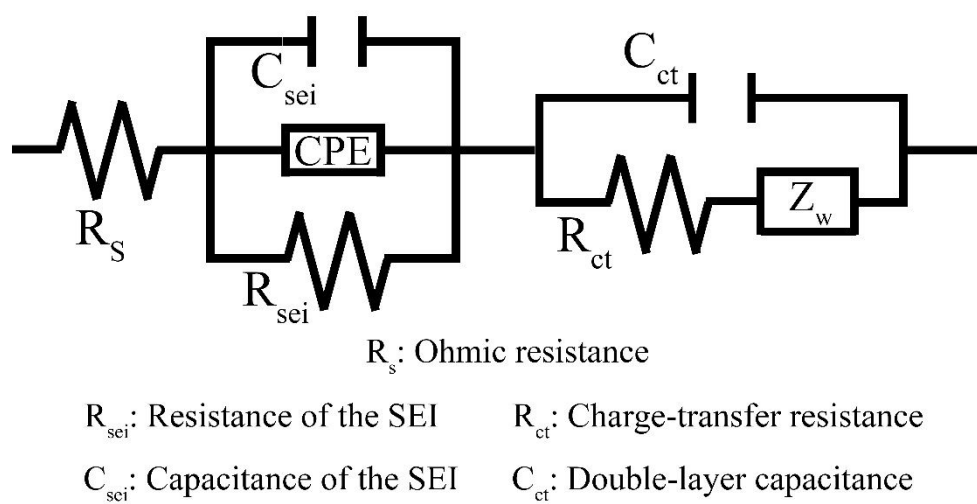

Figure S9. Modeled equivalent circuit of EIS.

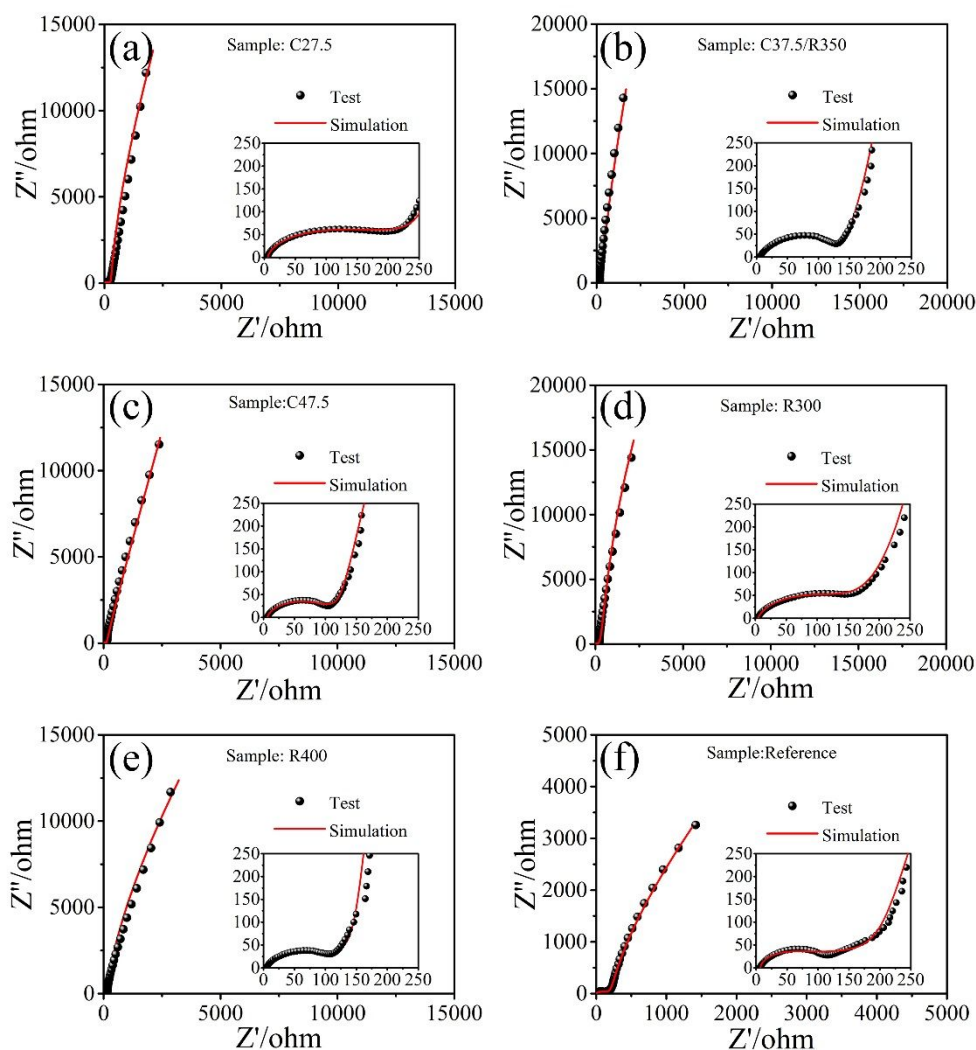

Figure S10. Experimental and simulated EIS spectra with the equivalent circuit of electrodes (a) C27.5, (b) C37.5/R350, (c) C47.5, (d) R300, (e) R400, (f) reference (high-frequency region Nyquist plots as an inset).

Table S1. Electrode resistance obtained from equivalent circuit fitting of experimental data.

| Sample            | Angle (°) | $R_s$ ( $\Omega$ ) | $R_{sei}$ ( $\Omega$ ) | $R_{ct}$ ( $\Omega$ ) | $Z_w$ ( $10^{-5}$ ) |
|-------------------|-----------|--------------------|------------------------|-----------------------|---------------------|
| <b>C27.5</b>      | 71        | 6.736              | 309.8                  | 2.897                 | 5.407               |
| <b>C37.5/R350</b> | 85        | 6.599              | 168                    | 1.912                 | 2.694               |
| <b>C47.5</b>      | 72        | 6.488              | 138.1                  | 2.431                 | 7.509               |
| <b>R400</b>       | 60        | 6.502              | 166.3                  | 5.883                 | 9.621               |
| <b>R300</b>       | 74        | 6.987              | 291.4                  | 2.112                 | 4.165               |
| <b>Reference</b>  | 4         | 7.021              | 302.1                  | 6.661                 | 54.4                |



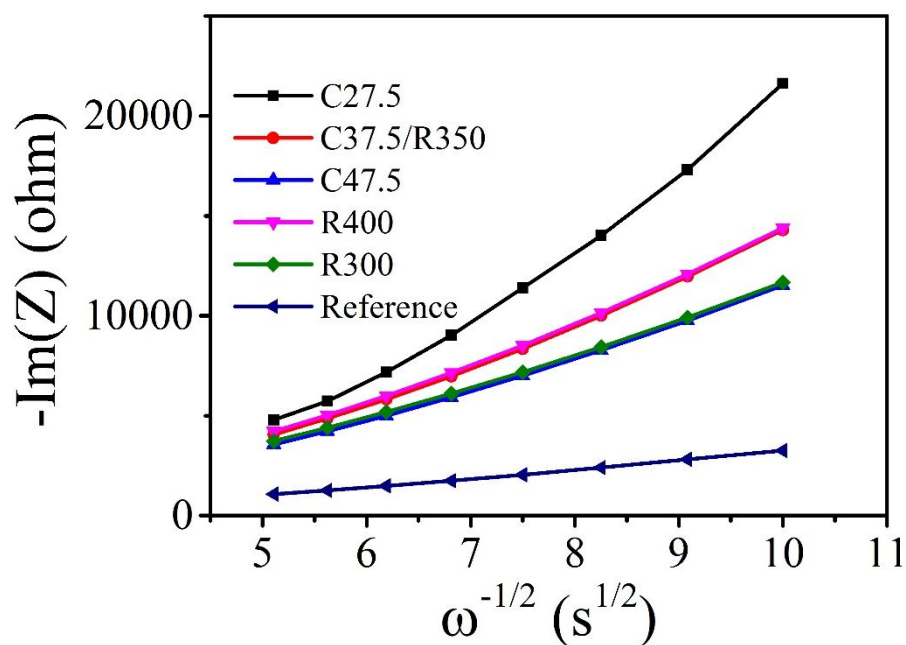

Figure S11. The  $-\text{Im}(Z)$  as a function of  $\omega^{-1/2}$  in low frequency region for C27.5, C37.5/R350, C47.5, R300, R400 and reference electrodes.

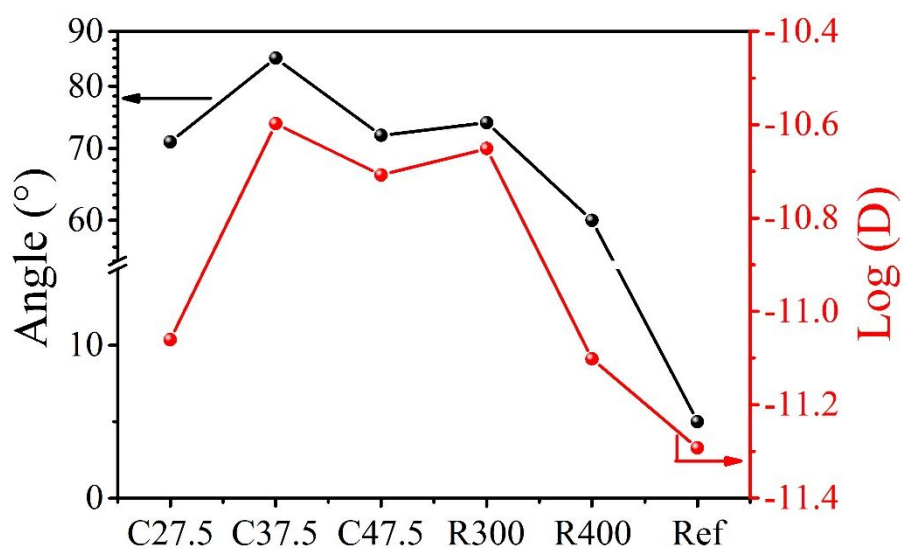

Figure S12. The relationship between diffusion coefficient of  $\text{Li}^+$  and the alignment degree of C27.5, C37.5/R350, C47.5, R300, R400 and reference electrodes.

Table S2. Comparison between the electrochemical performance of the aligned structure electrodes previously reported and that of our electrodes.

| Material                  | Current density            | Capacity retention | Thickness (μm) | References |
|---------------------------|----------------------------|--------------------|----------------|------------|
| Si/CNT                    | 1.3C-15C                   | 25.7%              | ≈10            | Ref.20     |
| ZnO/graphene              | 80-6400 mA g <sup>-1</sup> | 24.8%              | ≈1             | Ref.37     |
| CNT/graphene paper        | 0.1C-10C                   | 17.9%              | ≈40            | Ref.21     |
| Graphite                  | C/30-2C                    | 14.7%              | ≈200           | Ref.31     |
| graphene/GeO <sub>x</sub> | 0.5C-15C                   | 56%                | 3-10           | Ref.38     |
| Ge/CNT                    | 0.5C-10C                   | 60%                | ≈0.93          | Ref.22     |
| Graphite                  | C/30-2C                    | 18.5%              | ≈160           | This work  |

## Calculation method

The critical angle velocity can be obtained by the following formula:

$$\omega_c = \frac{\mu_0 \chi_{ps}^2 H_0^2}{18(f/f_0)\eta(\chi_{ps} + 1)} \left[ \frac{(a+d)(b+d)^2}{ab^2} - 1 \right] \quad (S1)$$

where  $\chi_{ps}$  represents the susceptibility of functionalized graphite that is equal to the ratio of the special magnetization  $M_s$  to magnetic field intensity  $H$ , where  $M_s$  is observed by the magnetic hysteresis loops (as shown in Fig. S6). By calculation,  $\chi_{ps}$  of functionalized graphite which is prepared with the ferrofluid concentration of 17.5, 27.5, 37.5, 47.5 and 57.5 μl g<sup>-1</sup> are 0.573, 0.631, 1.382, 0.937 and 0.836, respectively. The value of  $H_0$  is 2379 Oe measured by a digital Gauss meter. The viscosity  $\eta$  of suspension measured with capillaries is 18.3 mPa·s.  $d$  represents the diameter of Fe<sub>3</sub>O<sub>4</sub> nanoparticle which is about 12 nm.

In this experiment, two types of graphite flakes with different particle sizes are used. To explore the effect on the alignment, keeping other experimental parameters (the rotating speed of  $350 \text{ r min}^{-1}$  and the ferrofluid concentration of  $37.5 \text{ } \mu\text{l g}^{-1}$ ), we prepare the electrodes with different mass ratio of large graphite flakes to small graphite flakes, which are 1:0, 4:1, 1:1, 1:4 and 0:1, respectively. Fig. S13 shows the cross-sectional SEM images of electrodes, which demonstrate the angles of  $73^\circ$ ,  $85^\circ$ ,  $68^\circ$ ,  $58^\circ$  and  $45^\circ$ , respectively. It is observed that all the small flakes (0:1) or more small flakes (1:4) are not conducive to the alignment of the graphite while the ratio of 4:1 is beneficial to obtain the alignment with higher angle. It means that large graphite flakes as host materials plays a sustaining role and the small graphite plays a correction role during the alignment of electrodes. Therefore, the ratio of 4:1 is fixed in the following study. And the value of a and b is identified as half the thickness and half the diameter of large graphite flakes because the mass of small flakes is negligible relative to large flakes, which a is  $4.1 \text{ } \mu\text{m}$  and b is  $22 \text{ } \mu\text{m}$ :

$$\frac{f}{f_0} = \frac{4}{3} \frac{1-p^2}{(2-p^2aS)} \quad (\text{S2})$$

Where,  $p = b/a$

$$S = \frac{(2/a)}{(p^2 - 1)^{1/2} \tan[(p^2 - 1)^{1/2}]} \quad (\text{S3})$$

The value of  $f/f_0$  is calculated to be 0.31841.

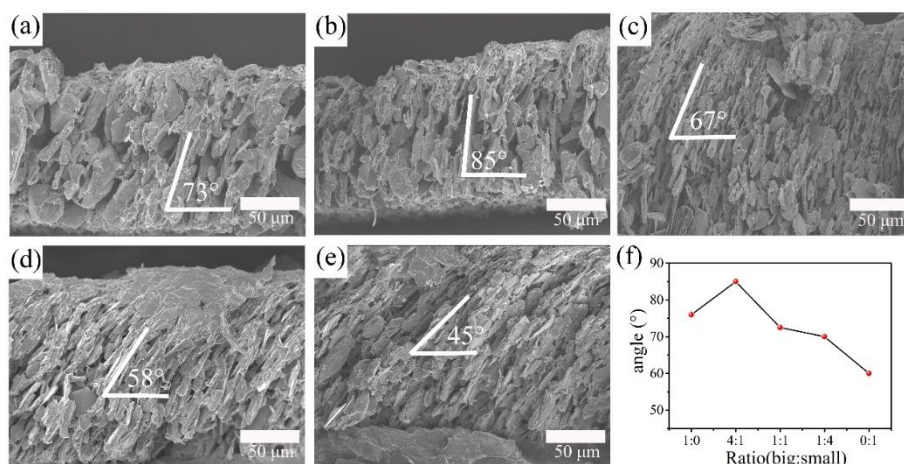

Figure S13. Cross-sectional SEM images of graphite negative electrodes prepared with the ratio of large graphite to small graphite are (a) 1:0, (b) 4:1, (c) 1:1, (d) 1:4, (e) 0:1, respectively. (f) Evolution of the angle as a function of the ratio of large graphite to small graphite.

## Electrode Tableting

From EIS results, it is observed that the aligned electrodes exhibit relatively higher charge transfer impedance compared with that of reference electrode. This is mainly due to the poor contact between the aligned flakes and current collector. Generally, tableting is the necessary step for preparing the conventional electrode, which can increase the contact area between the electrode materials and the current collectors and reduce the charge transfer impedance. However, the step of tableting is absent in the process of preparing the aligned electrode. Therefore, we attempt to tablet the aligned electrodes and explore the effect of tableting on the aligned structure and performance of electrodes. Here, C37.5 as the typical electrode, is tableted under the pressure of 1000N, 1500N, 2000N, 2500N, 3000N, 3500N and 4000N, respectively. Fig. S14 (a)-(h) shows cross-section SEM images of electrodes tableting at different pressures. It is obviously that tableting has some effect

on the degree of alignment, although the alignment remains. The angles are  $85^\circ$ ,  $68^\circ$ ,  $72^\circ$ ,  $78^\circ$ ,  $74^\circ$ ,  $69^\circ$ ,  $63^\circ$  and  $50^\circ$  corresponding to the pressure of 0N, 1000N, 1500N, 2000N, 2500N, 3000N, 3500N and 4000N, respectively, which are lower than that of C37.5. The results are further confirmed by XRD images (as seen in Fig. S14i). It is shown that angles tend to increase first and then decrease, which can be explained by force analysis. As shown in the Fig. S16, the pressure (expressed with “F”) from tableting is perpendicular to the current collector which can be decomposed in two directions (the component force  $F_1$  perpendicular to graphite flakes and the component force  $F_2$  parallel to graphite flakes). The force  $F_1$  and  $F_2$  are expressed in the terms of  $F\cos\theta$  and  $F\sin\theta$ , respectively. The force  $F_2$  can not only improve the order degree of electrode in the extrusion process, but also make the graphite electrode becoming more compact, while the force  $F_1$  can drive graphite flakes progressively paralleling to current collectors. These two forces compete with each other. Exerting a relatively small F on electrode, force  $F_2$  is much larger than force  $F_1$ , so that the effect of force  $F_1$  on electrodes is negligible and force  $F_2$  can improve the order degree of the electrodes. When gradually increasing F, force  $F_1$  act on the electrodes to further destroy the order degree.

Considering that the 1000N is a minimum force, we assemble the half-cell and measure the electrochemical performance. Fig. S15 shows the rate performance of tableted, non-tableted and reference electrodes at different rates. The specific capacity of tableted electrode is obviously higher than that of non-tableted electrode when the rate is less than C/5. While the rate exceeds C/5, the specific capacity of tableted electrode rapidly decreases compared with non-tableted electrode because of the ordering damage. Surprisingly, the specific capacity of tableted electrode is still higher than that of reference electrode especially at high rate, which improve the rate performance

of electrode. Moreover, Fig. S15d displays that the charge-transfer resistance becomes smaller after tableting, which indicating tableting can effectively improve the charge transfer in electrodes. In the follow work, we will further improve the tableting process to enhance the rate performance of LIBs.

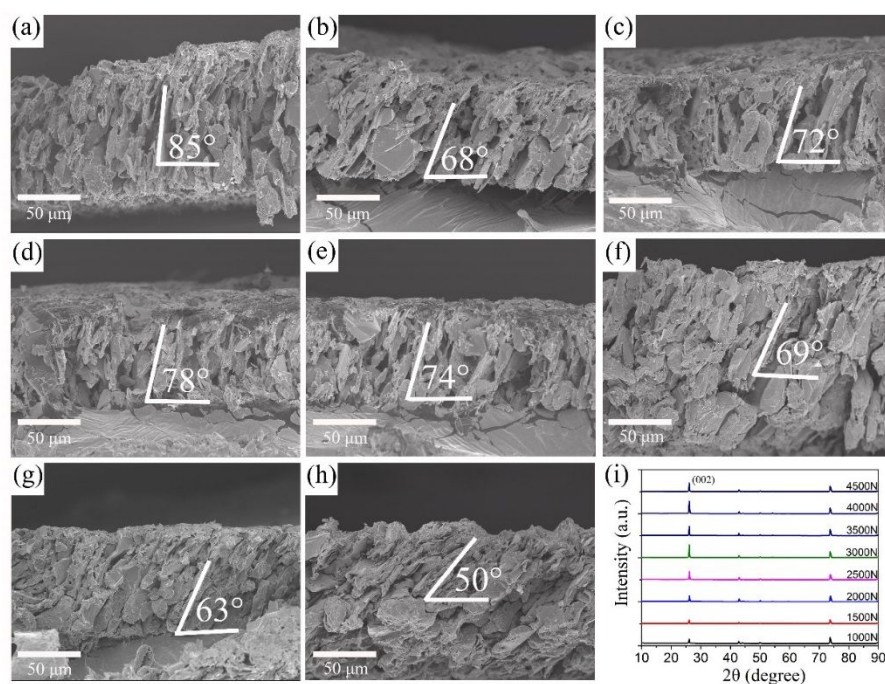

Figure S14. (a)-(h) Cross-sectional SEM images of electrodes tableted at different pressure of 0 N, 1000 N, 1500 N, 2000 N, 2500 N, 3000 N, 3500 N and 4000 N, respectively. (i) XRD images of electrodes tableted at different pressure.



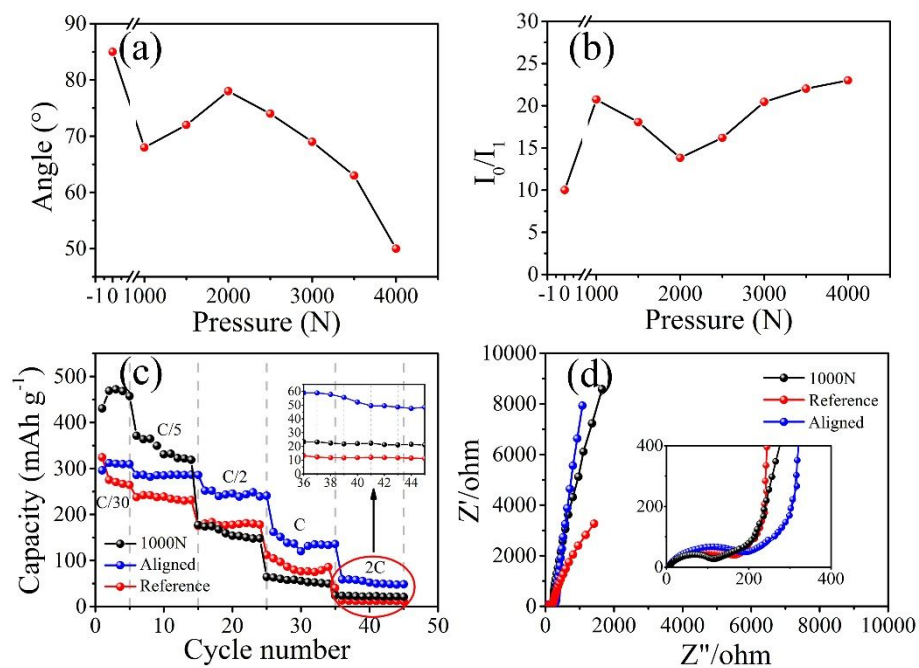

Figure S15. (a) The relationship between the angle of graphite electrodes and tableting pressure. (b) Tableting pressure dependence of relative intensity ratio of 26° peak to 56° peak. (c) Rate performance of electrodes before and after tableting at 1000N reference electrode. (d) EIS images of electrodes before and after tableting at 1000N and reference electrode.

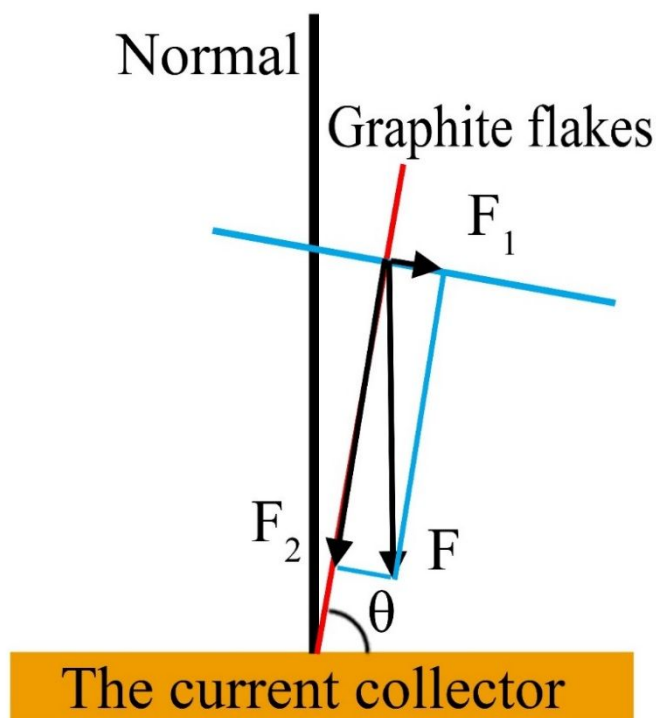

Figure S16. The force analysis of graphite flakes in the process of tabletting.

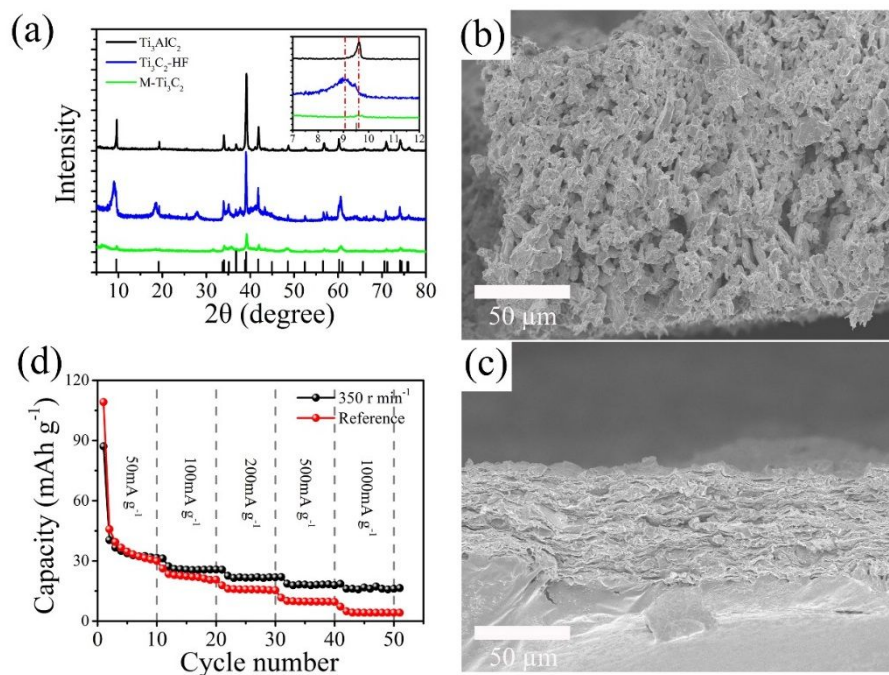

Figure S17. Magnetic arrangement for  $\text{Ti}_3\text{C}_2$  electrodes. (a) XRD patterns of  $\text{Ti}_3\text{AlC}_2$ , multilayer  $\text{Ti}_3\text{C}_2$  and few-layer  $\text{Ti}_3\text{C}_2$ . (b) and (c) Cross-sectional SEM images of the aligned and unaligned electrodes, respectively. (d) The rate capacity of unaligned and aligned  $\text{Ti}_3\text{C}_2$  electrodes.

Multilayer  $\text{Ti}_3\text{C}_2$  is prepared by exfoliating the Al element from the  $\text{Ti}_3\text{AlC}_2$  in 40 % HF solution at room temperature for 24 h. The few-layer  $\text{Ti}_3\text{C}_2$  is prepared via a mechanical-milling method with a planetary ball-mill apparatus. The structure and phase characteristics of  $\text{Ti}_3\text{AlC}_2$ ,  $\text{Ti}_3\text{C}_2$ -HF and M-  $\text{Ti}_3\text{C}_2$  are determined by XRD as shown in the Fig. S17a. According to the formula (1), we can get  $\omega_c = 33 \text{ rad s}^{-1}$ , which corresponding rotating speed of  $315 \text{ r min}^{-1}$ . In the parameters, a and b are  $0.5 \text{ }\mu\text{m}$  and  $2 \text{ }\mu\text{m}$ , respectively.  $\chi_{ps}$  is 0.937 which corresponding ferrofluid concentration is  $37.5 \text{ }\mu\text{l g}^{-1}$ .  $\eta$  is  $18.3 \text{ mPa}\cdot\text{s}$ . Therefore, we prepared the  $\text{Ti}_3\text{C}_2$  (MXene) electrode at rotating speed of  $350 \text{ r min}^{-1}$ . As shown in the Fig. S17c, in the unaligned electrode,  $\text{Ti}_3\text{C}_2$  flakes are almost parallel to the current collector and densely packed. However, in the aligned electrode,  $\text{Ti}_3\text{C}_2$  flakes are almost vertically to the current collector (as shown in the Fig. S17b). In order to investigate the electrochemical performance of  $\text{Ti}_3\text{C}_2$  electrodes prepared magnetic field, the rate performance is tested in a half-cell configuration. As shown in the Fig. S17d, the specific capacity of aligned electrode is  $17.2 \text{ mAh g}^{-1}$  which is 4.2 times the specific capacity of unaligned electrode which is  $4.2 \text{ mAh g}^{-1}$ . The specific capacity can be further improved by optimizing the rotating speed in further work.
